# Supplementary material for: Relating Linear Energy Transfer to the Formation and Resolution of DNA Repair Foci After Irradiation with Equal Doses of X-ray Photons, Plateau, or Bragg-Peak Protons
Source: MDPI journal article supplement (doi:10.3390/ijms19123779), 2018-11-28
Supplement: s1 [file s1]

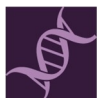

### Supplementary information

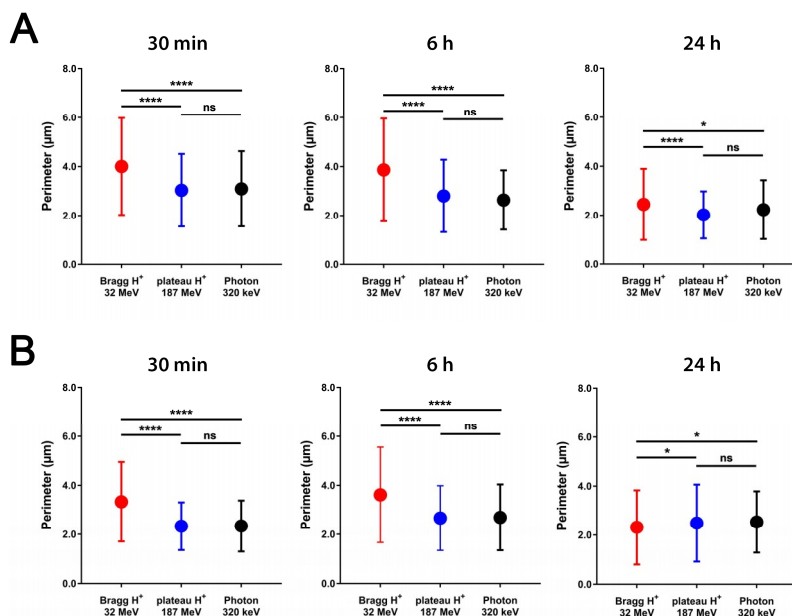

**Figure S1.** In-depth analysis of  $\gamma\text{H2A.X}$  foci perimeter after different types of IR. Prostate cancer cells (TrC1) (**A**) and murine embryonic fibroblasts (MEFs) (**B**) were fixed at distinct timepoints after 3 Gy of Bragg-peak proton, plateau proton, or photon irradiation, respectively. The graph sets display differences in foci perimeter at three representative timepoints (0.5 h, 6 h, and 24 h) after different types of irradiation. Data represent mean values of at least 1000 foci  $\pm$  SD obtained from three independent experiments. \*  $p < 0.05$ , \*\*\*\*  $p < 0.0001$ , ns = not significant; multiple t-tests.

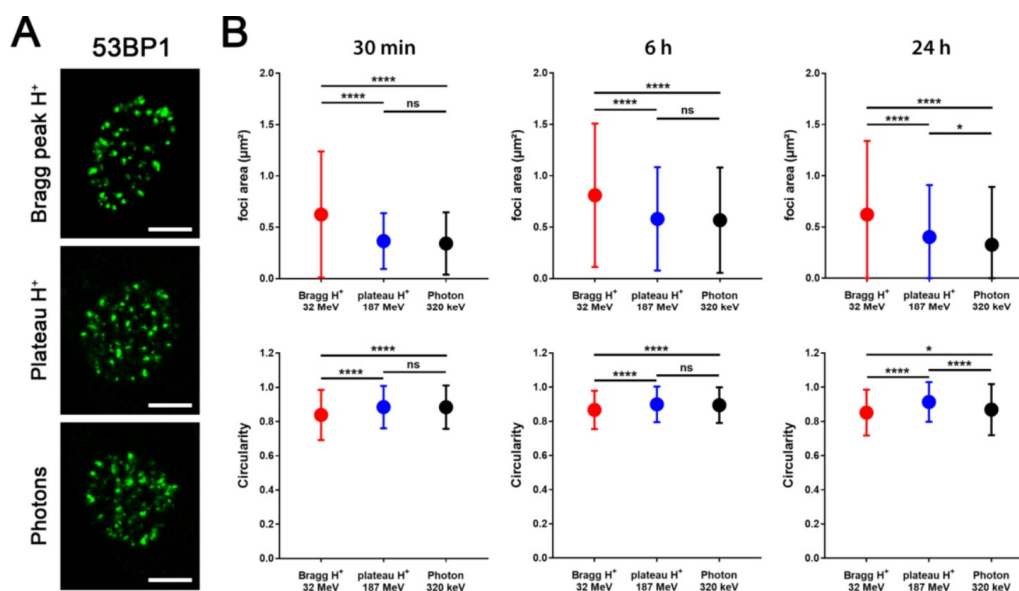

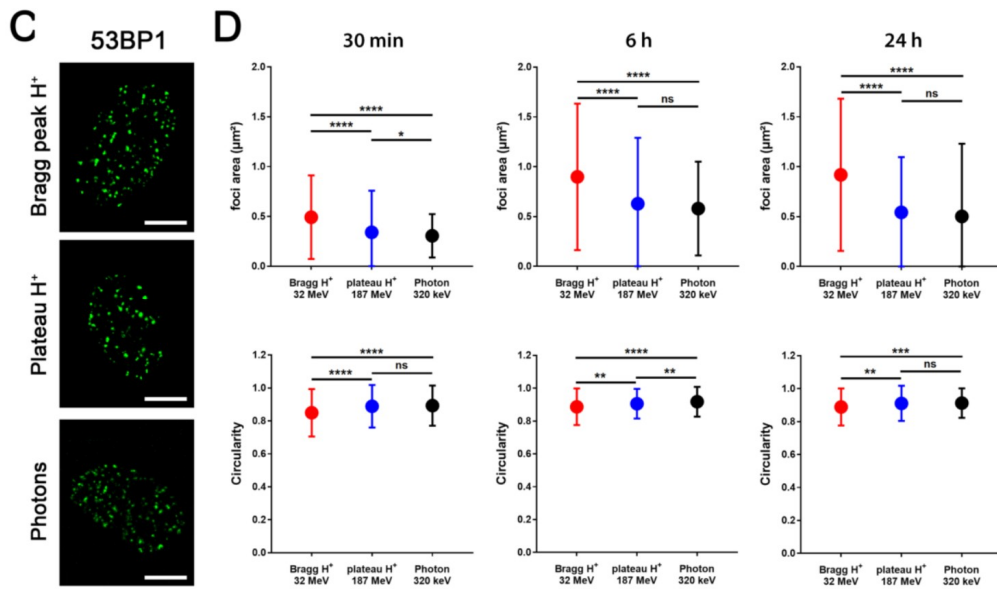

**Figure S2.** In-depth analysis of 53BP1 foci appearance after different types of IR. TrC1 (A, B) and MEFs (C, D) were fixed at distinct timepoints after 3 Gy of Bragg-peak proton, plateau proton, or X-ray photon irradiation, respectively. Double strand break (DSB) sites were indirectly stained for 53BP1 via immunofluorescence. A and C show representative high-resolution images which were used for analysis of area, perimeter, and circularity of single foci (scale bar 5 µm). The graph sets B and D display differences in foci area (upper panel) and circularity (lower panel) at three representative timepoints (0.5 h, 6 h, and 24 h) after different types of irradiation. Data represent mean values of at least 1000 foci ± SD obtained from three independent experiments. \*  $p < 0.05$ , \*\*  $p < 0.01$ , \*\*\*  $p < 0.005$ , \*\*\*\*  $p < 0.0001$ , ns = not significant; multiple t-tests.

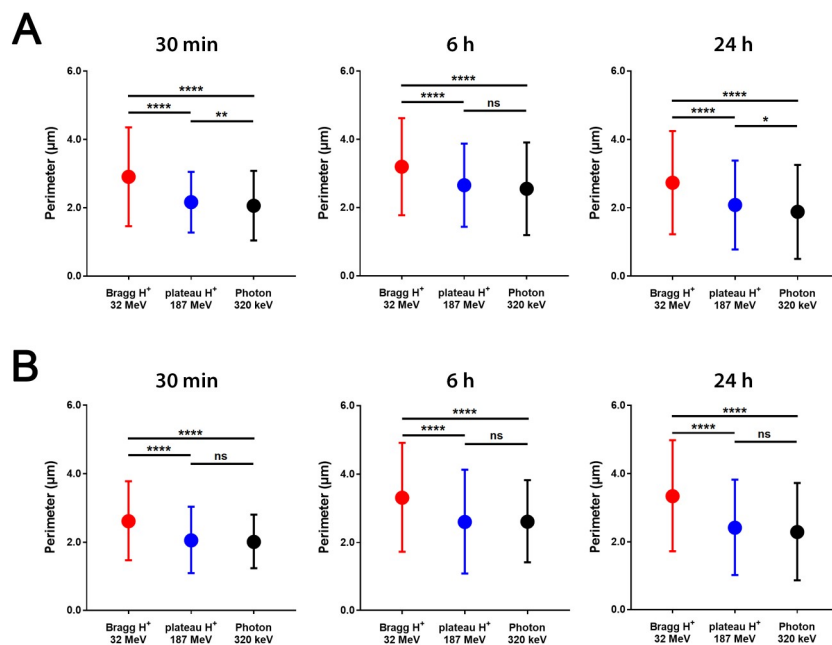

**Figure S3.** In-depth analysis of 53BP1 foci perimeter after different types of IR. TrC1 (A) and MEFs (B) were fixed at distinct timepoints after 3 Gy of Bragg-peak proton, plateau proton, or photon irradiation, respectively. The graph sets display differences in foci perimeter at three representative timepoints (0.5 h, 6 h, and 24 h) after different types of irradiation. Data represent mean values of at least 1000 foci ± SD obtained from three independent experiments. \*  $p < 0.05$ , \*\*  $p < 0.01$ , \*\*\*\*  $p < 0.0001$ , ns = not significant; multiple t-tests.
